# Supplementary material
Source: PubMed Central journal article supplement (PMC6645593)
Supplement: ao7b01464_si_001.pdf [file ao7b01464_si_001.pdf]

## Supporting Information

### JRgui: A Python Program of Joback and Reid Method

Chenyang Shi<sup>1\*</sup> and Thomas B. Borchardt<sup>1</sup>

1. *Drug Product Development, AbbVie, 1 North Waukegan Road, North Chicago, IL, 60064*

Corresponding email: [chenyang.shi@abbvie.com](mailto:chenyang.shi@abbvie.com)

## 1. A list of molecular descriptors available in JRgui

The PDF version of RDKit documentation ([http://www.rdkit.org/RDKit\\_Docs.current.pdf](http://www.rdkit.org/RDKit_Docs.current.pdf), created on October 8<sup>th</sup>, 2017) summarizes a list of available descriptors (pages 63-65). In addition to those, the eleven physical properties predicted by JR method, and crystalline/amorphous solubility by General Solubility Equations (1 for original GSE; 2 for modified version) are exported. Finally a list of 85 fragment descriptors is also calculated (fr\_Al\_COO to fr\_urea, last 85 columns in output csv file) and summarized in Table S1.

Table S1: The 85 molecular descriptors for describing fragments of molecule. (see also FragmentDescriptors.csv in the RDKit installation folder.)

| <b>Oxygen (15)</b>   |                                                        |
|----------------------|--------------------------------------------------------|
| fr_Al_OH             | Number of aliphatic hydroxyl groups                    |
| fr_Ar_OH             | Number of aromatic hydroxyl groups                     |
| fr_methoxy           | Number of methoxy groups -OCH <sub>3</sub>             |
| fr_oxime             | Number of oxime groups                                 |
| fr_ester             | Number of esters                                       |
| fr_Al_COO            | Number of aliphatic carboxylic acids                   |
| fr_Ar_COO            | Number of Aromatic carboxylic acids                    |
| fr_C_O               | Number of carbonyl O                                   |
| fr_C_O_noCOO         | Number of carbonyl O, excluding COOH                   |
| fr_COO               | Number of carboxylic acids                             |
| fr_COO <sub>2</sub>  | Number of carboxylic acids                             |
| fr_ketone            | "Number of ketones"                                    |
| fr_ether             | Number of ether oxygens (including phenoxy)            |
| fr_phenol            | Number of phenols                                      |
| fr_aldehyde          | Number of aldehydes                                    |
| <b>Nitrogen (27)</b> |                                                        |
| fr_quatN             | Number of quaternary nitrogens                         |
| fr_NH <sub>2</sub>   | Number of Primary amines                               |
| fr_NH <sub>1</sub>   | Number of Secondary amines                             |
| fr_NH <sub>0</sub>   | Number of Tertiary amines                              |
| fr_Ar_N              | Number of aromatic nitrogens                           |
| fr_ArN               | Number of N functional groups attached to aromatics    |
| fr_Ar_NH             | Number of aromatic amines                              |
| fr_aniline           | Number of anilines                                     |
| fr_Imine             | Number of Imines                                       |
| fr_nitrile           | Number of nitriles                                     |
| fr_hdrzine           | Number of hydrazine groups                             |
| fr_hdrzone           | Number of hydrazone groups" Includes cyclic hydrazones |
| fr_nitroso           | Number of nitroso groups                               |
| fr_N_O               | Number of hydroxylamine groups                         |
| fr_nitro             | Number of nitro groups                                 |
| fr_azo               | Number of azo groups                                   |
| fr_diazo             | Number of diazo groups                                 |
| fr_azide             | Number of azide groups                                 |
| fr_amide             | Number of amides                                       |
| fr_priamide          | Number of primary amides                               |
| fr_amidine           | Number of amidine groups                               |
| fr_guanido           | Number of guanidine groups                             |
| fr_Nhpyrrole         | Number of H-pyrrole nitrogens                          |
| fr_imide             | Number of imide groups                                 |
| fr_isocyan           | Number of isocyanates                                  |
| fr_isothiocyan       | Number of isothiocyanates                              |
| fr_thiocyan          | Number of thiocyanates                                 |

| <b>Halogens (2)</b>                         |                                                                                   |
|---------------------------------------------|-----------------------------------------------------------------------------------|
| fr_halogen                                  | Number of halogens                                                                |
| fr_alkyl_halide                             | Number of alkyl halides                                                           |
| <b>Sulfurs (5)</b>                          |                                                                                   |
| fr_sulfide                                  | Number of thioether                                                               |
| fr_SH                                       | Number of thiol groups                                                            |
| fr_sulfone                                  | Number of sulfone groups                                                          |
| fr_sulfonamd                                | Number of sulfonamides                                                            |
| fr_prisulfonamd                             | Number of primary sulfonamides                                                    |
| <b>Miscellaneous Functional Groups (19)</b> |                                                                                   |
| fr_barbitur                                 | Number of barbiturate groups                                                      |
| fr_urea                                     | Number of urea groups                                                             |
| fr_term_acetylene                           | Number of terminal acetylenes                                                     |
| fr_imidazole                                | Number of imidazole rings                                                         |
| fr_furan                                    | Number of furan rings                                                             |
| fr_thiophene                                | Number of thiophene rings                                                         |
| fr_thiazole                                 | Number of thiazole rings                                                          |
| fr_oxazole                                  | Number of oxazole rings                                                           |
| fr_pyridine                                 | Number of pyridine rings                                                          |
| fr_piperdine                                | Number of piperdine rings                                                         |
| fr_piperzine                                | Number of piperzine rings                                                         |
| fr_morpholine                               | Number of morpholine rings                                                        |
| fr_lactam                                   | Number of beta lactams                                                            |
| fr_lactone                                  | Number of cyclic esters (lactones)                                                |
| fr_tetrazole                                | Number of tetrazole rings                                                         |
| fr_epoxide                                  | Number of epoxide rings                                                           |
| fr_unbrch_alkane                            | Number of unbranched alkanes of at least 4 members (excludes halogenated alkanes) |
| fr_bicyclic                                 | Bicyclic                                                                          |
| fr_benzene                                  | Number of benzene rings                                                           |
| <b>Phosphates (2)</b>                       |                                                                                   |
| fr_phos_acid                                | Number of phosphoric acid groups                                                  |
| fr_phos_ester                               | Number of phosphoric ester groups                                                 |
| <b>Topliss Metabolism (15)</b>              |                                                                                   |
| fr_nitro_ arom                              | Number of nitro benzene ring substituents                                         |
| fr_nitro_ arom_nonortho                     | Number of non-ortho nitro benzene ring substituents                               |
| fr_dihydropyridine                          | Number of dihydropyridines                                                        |
| fr_phenol_noOrthoHbond                      | Number of phenolic OH excluding ortho intramolecular Hbond substituents           |
| fr_Al_OH_noTert                             | Number of aliphatic hydroxyl groups excluding tert-OH                             |
| fr_benzodiazepine                           | Number of benzodiazepines with no additional fused rings                          |
| fr_para_hydroxylation                       | Number of para-hydroxylation sites                                                |
| fr_allylic_oxid                             | Number of allylic oxidation sites excluding steroid dienone                       |
| fr_aryl_methyl                              | Number of aryl methyl sites for hydroxylation                                     |
| fr_Ndealkylation1                           | Number of XCCNR groups                                                            |
| fr_Ndealkylation2                           | Number of tert-alicyclic amines (no heteroatoms)                                  |
| fr_alkyl_carbamate                          | Number of alkyl carbamates (subject to hydrolysis)                                |
| fr_ketone_Topliss                           | Number of ketones excluding diaryl                                                |
| fr_ArN                                      | Number of N functional groups attached to aromatics                               |
| fr_HOCCN                                    | Number of C(OH)CCN-Ctert-alkyl or C(OH)CCNcyclic                                  |
